# Supplementary material for: Stepwise assembly of linearly-aligned Ru–M–Ru (M = Pd, Pt) heterotrimetallic complexes with σ-4-ethynylpyridine spacer
Source: Royal Society of Chemistry journal article supplement (doi:10.1039/b719820e), 2008-01-01

RuCl2(dppm)2que#5-12 RT: 0.12-0.30 AV: 8 NL: 3.03E8  
T: + c Full ms [ 50.00-2000.00]

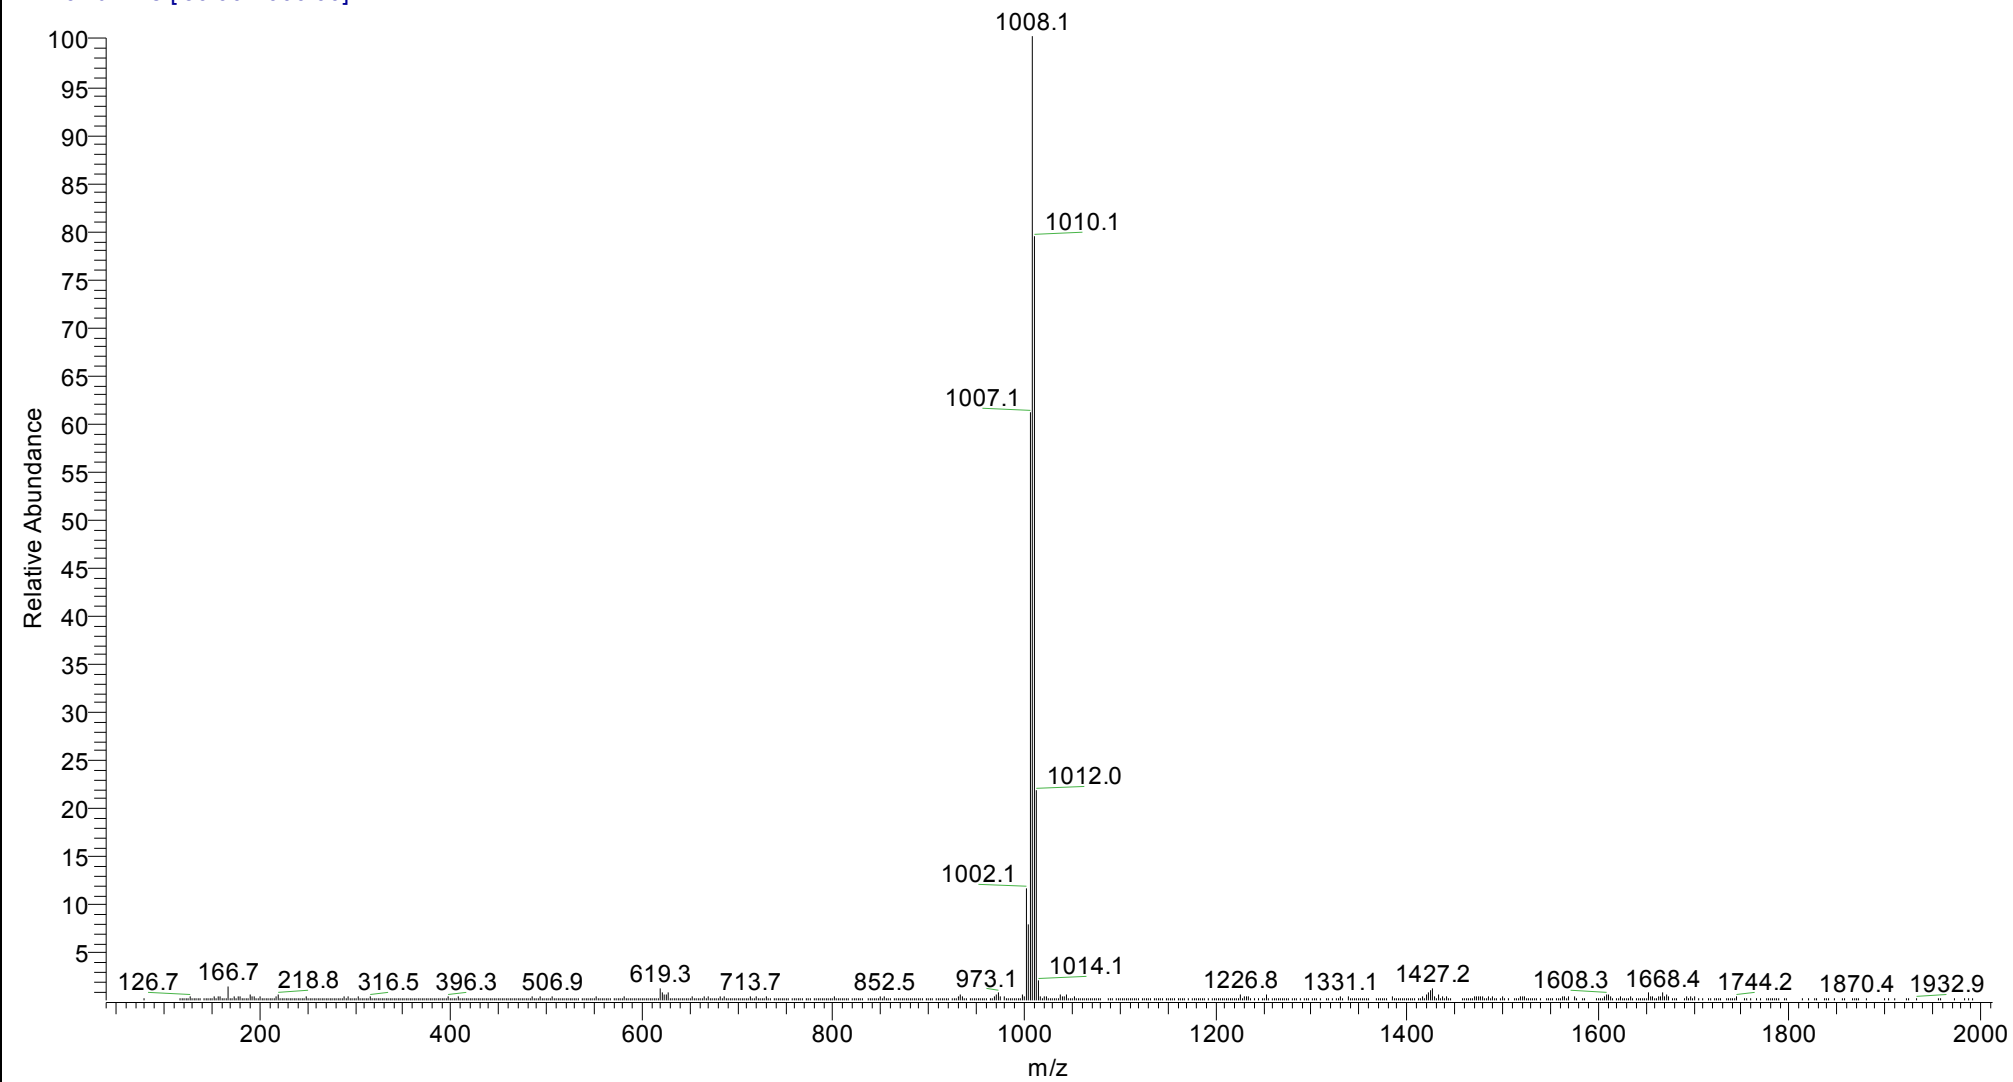

2Ru-Pt\_051104102949#80-86 RT: 2.10-2.23 AV: 7 NL: 3.43E6  
T: + c Full ms [ 650.00-2000.00]

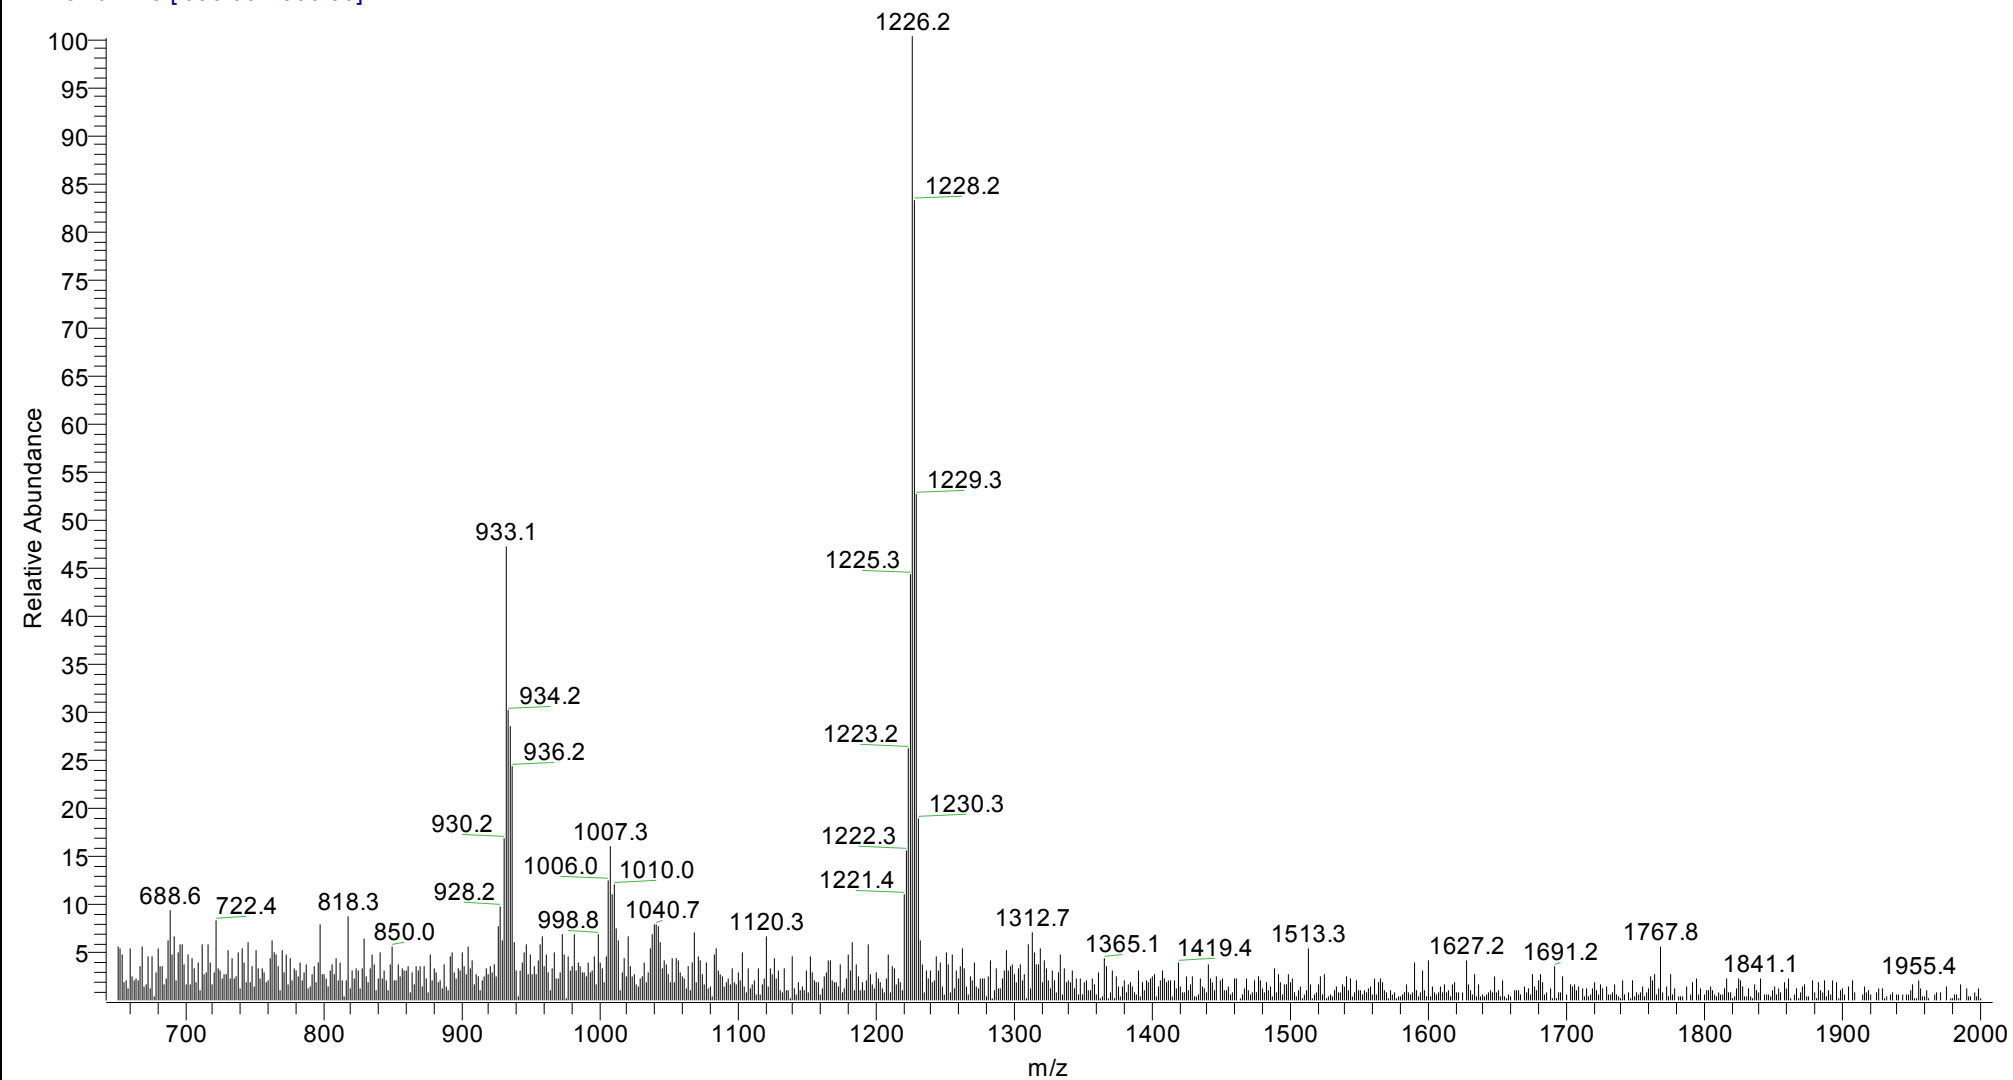

2Ru-Pt#96-102 RT: 2.72-2.89 AV: 7 NL: 4.78E6  
T: + c Full ms [ 50.00-2000.00]

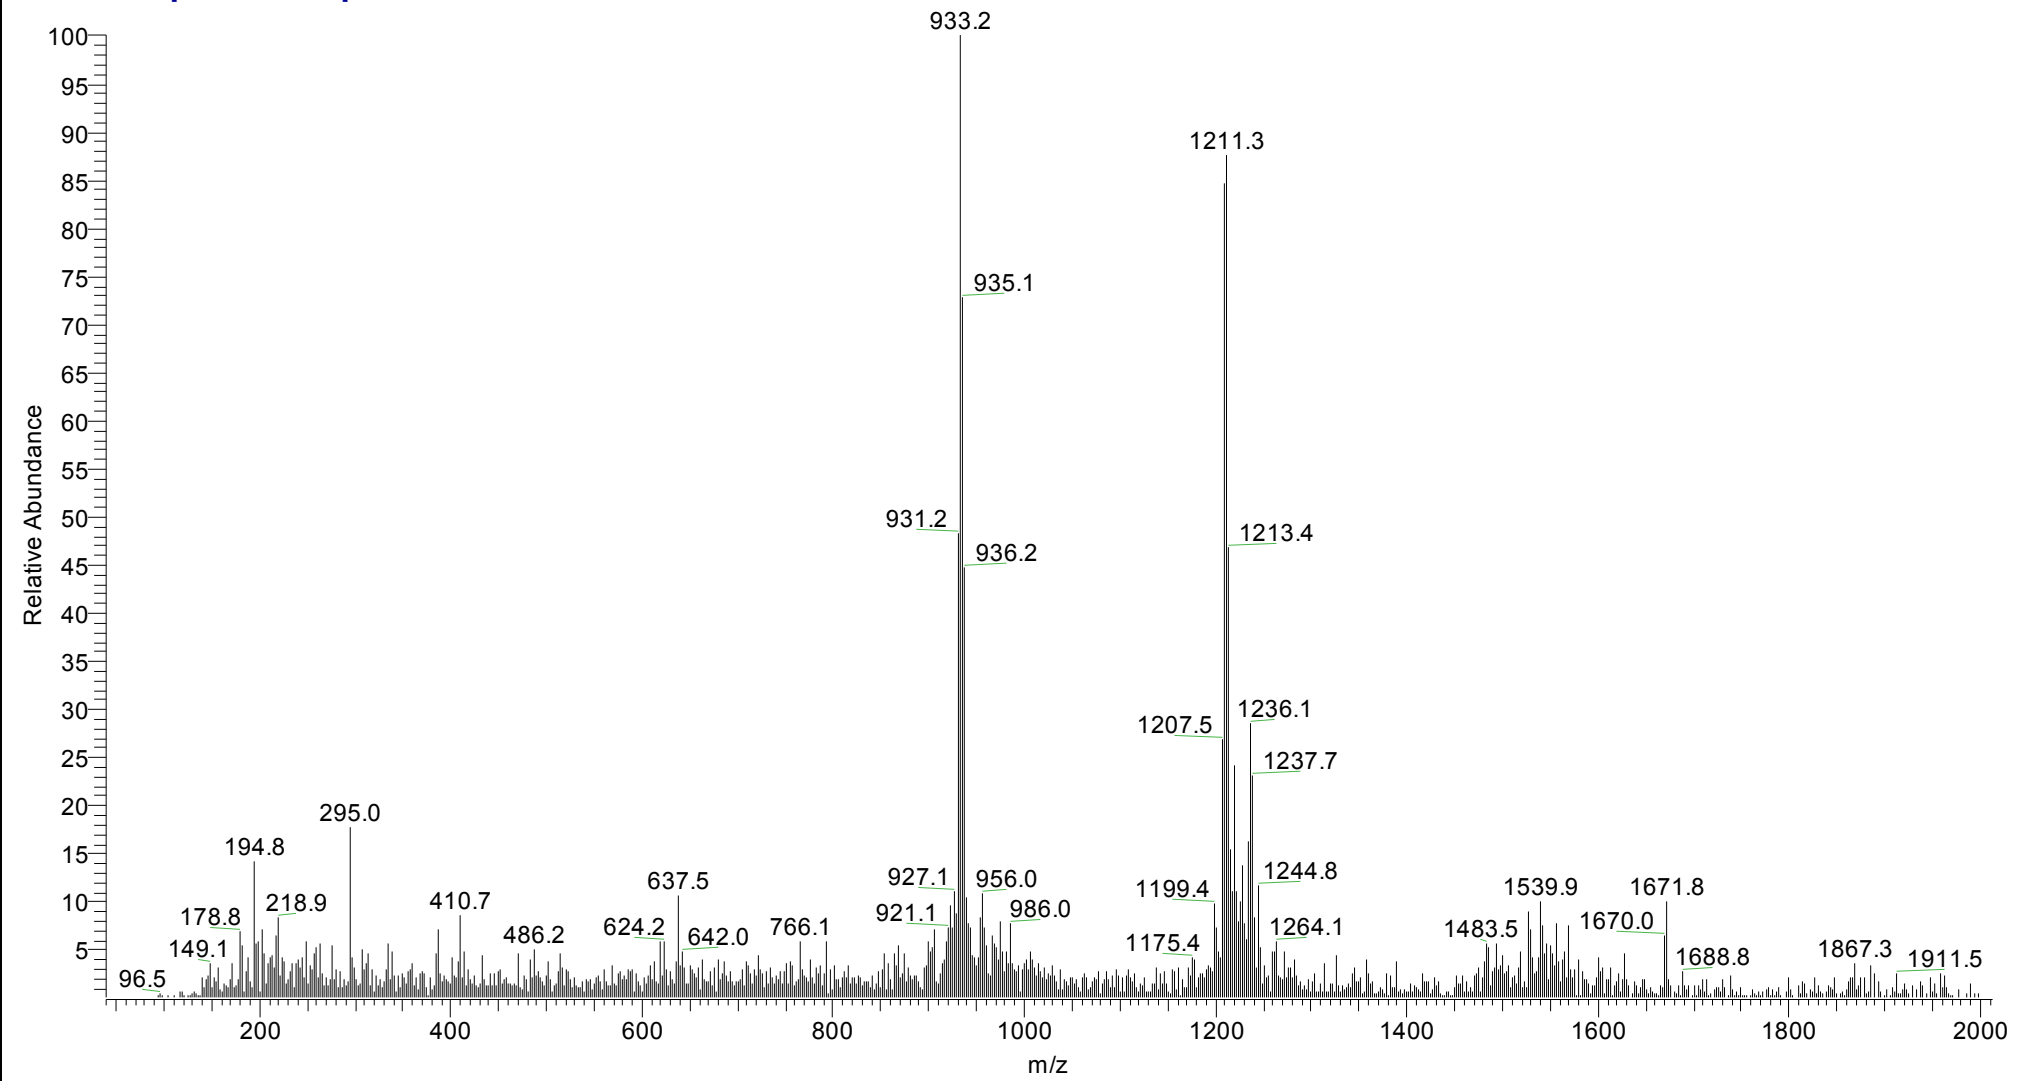

RuCl(dppm)2(4-ethynyl-py)(PF6)#31-34 RT: 0.76-0.83 AV: 4 NL: 3.78E8  
T: + c Full ms [ 200.00-2000.00]

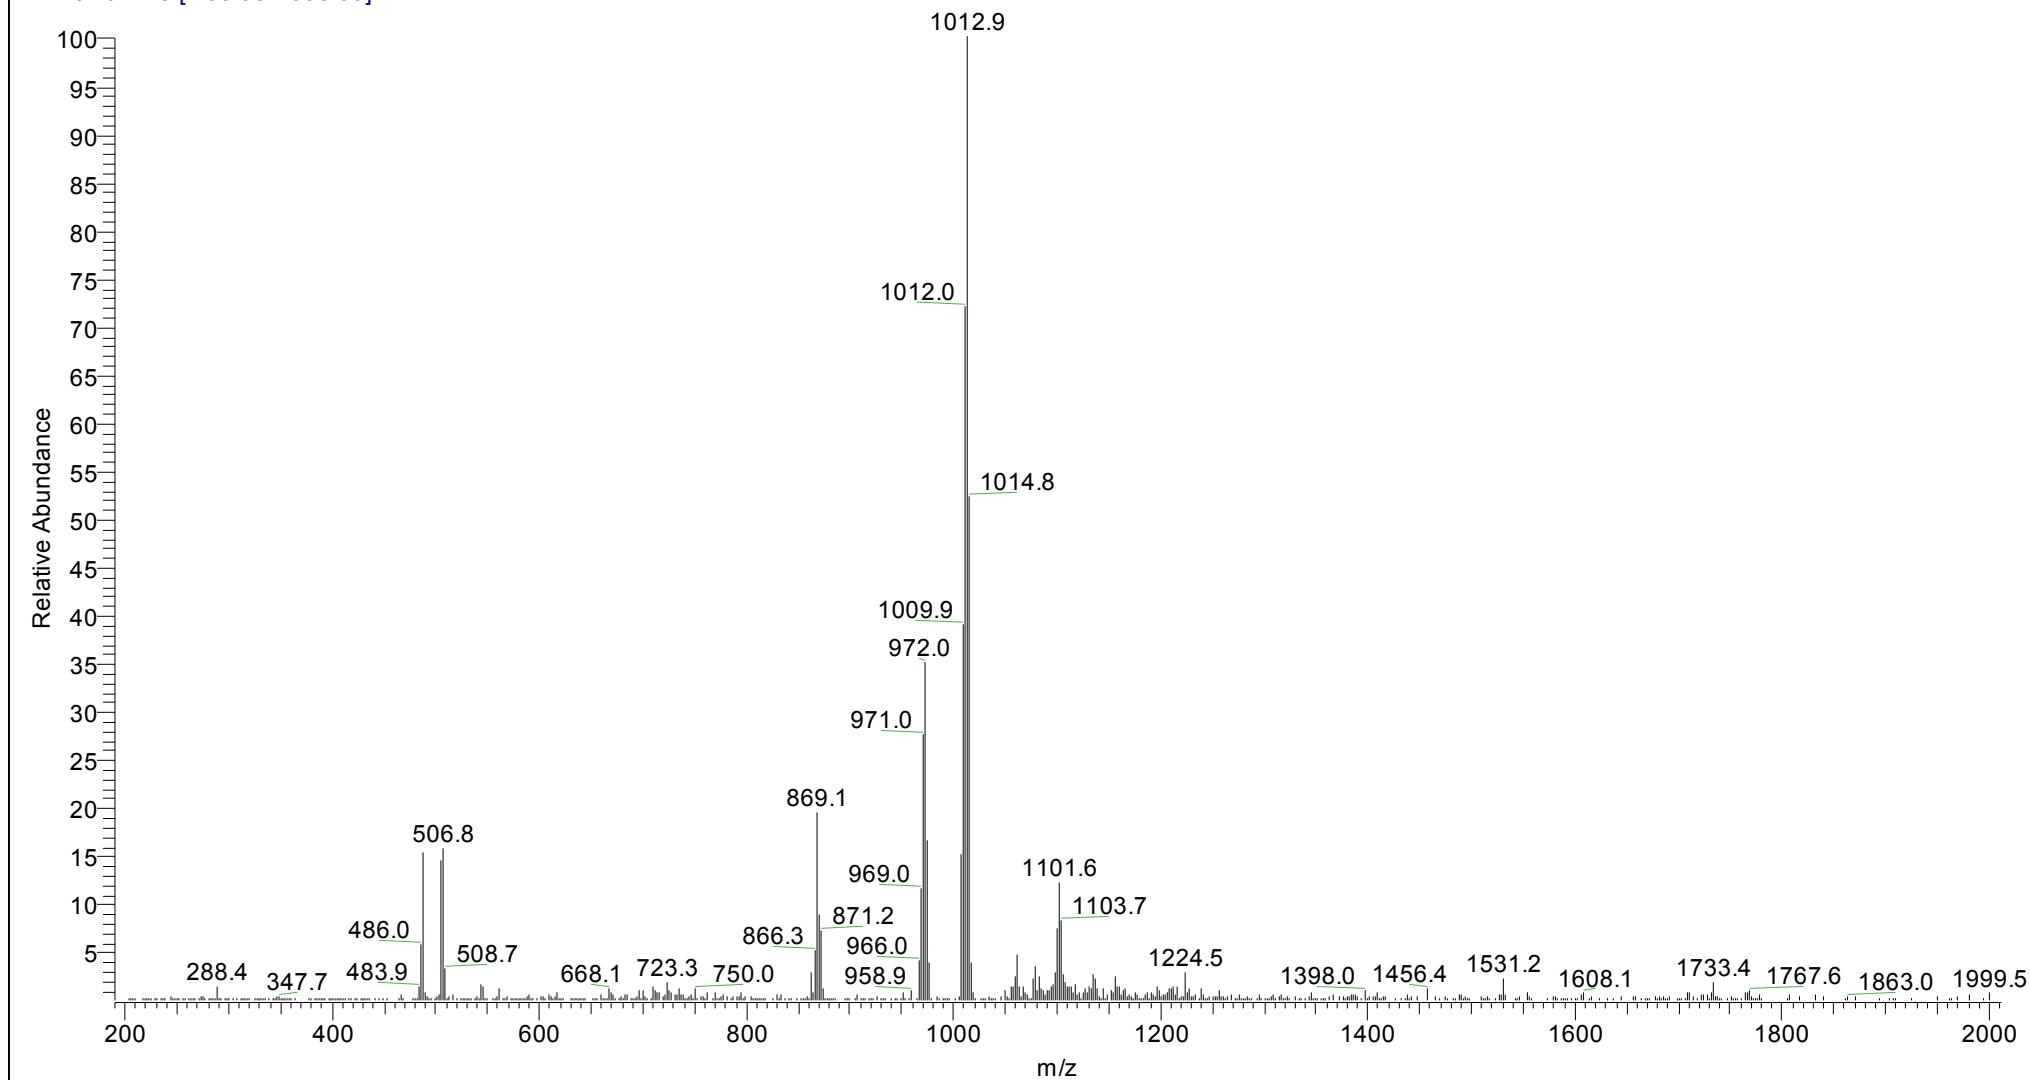

Supplement: b719820e.pdf [file b719820e.pdf]
